# Supplementary material for: A monoclinic crystal structure and a reusable stress-controlled optoelectronic switch in a lead halide perovskite, CsPbBr3
Source: Royal Society of Chemistry journal article supplement (doi:10.1039/d4tc05138f), 2025-01-01
Supplement: d4tc05138f1.pdf [file d4tc05138f1.pdf]

## Supporting Information

### Monoclinic crystal structure and a reusable stress-controlled optoelectronic switch in a lead halide perovskite, CsPbBr<sub>3</sub>

Natalia V. Morozova,<sup>\*a</sup> Irina V. Zhevstovskikh,<sup>a,b</sup> Igor V. Korobeinikov,<sup>a</sup> Maksim N. Sarychev,<sup>b</sup> Olga I. Semenova,<sup>c</sup> Taisiya S. Sukhikh,<sup>d</sup> and Sergey V. Ovsyannikov<sup>e,f</sup>

**Table S1. Intensity statistics for XRD data for the superstructure of CsPbBr<sub>3</sub> (*P2<sub>1</sub>/m*; *V* = 1590.5 Å<sup>3</sup>).**

| Resolution  | #Data | #Theory | %Complete | Redundancy | Mean I | Mean I/σ | R(int) | Rσ     |
|-------------|-------|---------|-----------|------------|--------|----------|--------|--------|
| Inf - 2.25  | 173   | 177     | 97.7      | 5.51       | 40.2   | 10.8     | 0.0307 | 0.0605 |
| 2.25 - 1.75 | 178   | 179     | 99.4      | 6.35       | 26.6   | 10.92    | 0.0373 | 0.0567 |
| 1.75 - 1.52 | 172   | 177     | 97.2      | 6.17       | 17.4   | 10.29    | 0.0473 | 0.054  |
| 1.52 - 1.37 | 183   | 183     | 100       | 6.51       | 18.2   | 6.54     | 0.0402 | 0.0596 |
| 1.37 - 1.27 | 185   | 185     | 100       | 6.11       | 13.7   | 8.55     | 0.0607 | 0.0663 |
| 1.27 - 1.19 | 177   | 177     | 100       | 5.88       | 7.3    | 6.23     | 0.0743 | 0.0681 |
| 1.19 - 1.14 | 172   | 172     | 100       | 5.4        | 10.4   | 6.58     | 0.063  | 0.0688 |
| 1.14 - 1.08 | 210   | 210     | 100       | 5.4        | 3.5    | 4.5      | 0.1118 | 0.0978 |
| 1.08 - 1.03 | 221   | 221     | 100       | 5.15       | 3.4    | 3.77     | 0.1075 | 0.105  |
| 1.03 - 0.99 | 206   | 206     | 100       | 5.18       | 5.6    | 4.91     | 0.0866 | 0.088  |
| 0.99 - 0.96 | 191   | 191     | 100       | 4.71       | 4.3    | 3.53     | 0.1082 | 0.1153 |
| 0.96 - 0.93 | 173   | 173     | 100       | 4.7        | 6.2    | 4.15     | 0.0839 | 0.0925 |
| 0.93 - 0.9  | 253   | 253     | 100       | 4.67       | 3.8    | 3.49     | 0.1122 | 0.1151 |
| 0.9 - 0.87  | 257   | 258     | 99.6      | 4.66       | 3.2    | 3.19     | 0.1393 | 0.1317 |
| 0.87 - 0.85 | 174   | 174     | 100       | 4.55       | 1.3    | 1.93     | 0.2798 | 0.2461 |
| 0.85 - 0.83 | 244   | 244     | 100       | 4.41       | 2.4    | 2.92     | 0.1887 | 0.1735 |
| 0.83 - 0.8  | 259   | 259     | 100       | 3.86       | 1.7    | 2.37     | 0.2301 | 0.2334 |
| Inf - 0.8   | 3428  | 3439    | 99.7      | 5.18       | 9.1    | 5.29     | 0.0602 | 0.0755 |

If the superstructure reflections, distinctly observable in the XRD patterns of CsPbBr<sub>3</sub> (Figure 1), are ignored from consideration, and only the reduced unit cell with *V*=795.2 Å<sup>3</sup> is considered, the crystal structure refinement in the orthorhombic *Pnma* symmetry would give relatively small *R*-factors, although, still yielding to the ones for *P2<sub>1</sub>/m* symmetry. For comparison, we present below Table S2 with data only for the substructure of CsPbBr<sub>3</sub> (the same massif, but ignoring the superstructural reflections) for the orthorhombic *Pnma* structure for the reduced unit cell with *V*=795.2 Å<sup>3</sup>. As one can see, the *R<sub>int</sub>* and *R<sub>sigma</sub>* magnitudes in this case are comparable with those for monoclinic *P2<sub>1</sub>/m* symmetry in the above Table S1 for the double unit cell with *V*=1590.5 Å<sup>3</sup>, based on the superstructural reflections.

**Table S2. Intensity statistics for XRD data for the substructure of CsPbBr<sub>3</sub> (*Pnma*; *V* = 795.2 Å<sup>3</sup>).**

| Resolution  | #Data | #Theory | %Complete | Redundancy | Mean I | Mean I/σ | R(int) | Rσ     |
|-------------|-------|---------|-----------|------------|--------|----------|--------|--------|
| Inf - 2.25  | 51    | 52      | 98.1      | 7.85       | 82.4   | 16.59    | 0.0346 | 0.0481 |
| 2.25 - 1.75 | 54    | 54      | 100       | 10.39      | 54.3   | 18.18    | 0.0435 | 0.0498 |
| 1.75 - 1.52 | 51    | 51      | 100       | 10.69      | 31.4   | 19.01    | 0.0522 | 0.0433 |
| 1.52 - 1.37 | 53    | 53      | 100       | 11.13      | 26.4   | 14.31    | 0.0663 | 0.0481 |
| 1.37 - 1.27 | 59    | 59      | 100       | 10.51      | 32.7   | 16.45    | 0.0551 | 0.0446 |

|             |     |     |      |       |      |       |        |        |
|-------------|-----|-----|------|-------|------|-------|--------|--------|
| 1.27 - 1.19 | 54  | 54  | 100  | 10.81 | 22.4 | 15.51 | 0.0719 | 0.0446 |
| 1.19 - 1.14 | 53  | 53  | 100  | 9.25  | 16.9 | 13.04 | 0.0723 | 0.0458 |
| 1.14 - 1.08 | 53  | 53  | 100  | 9.68  | 7.4  | 10.59 | 0.0964 | 0.0566 |
| 1.08 - 1.03 | 66  | 66  | 100  | 8.89  | 6.2  | 8.33  | 0.1047 | 0.065  |
| 1.03 - 0.99 | 63  | 63  | 100  | 9.35  | 10.2 | 10.62 | 0.0978 | 0.0559 |
| 0.99 - 0.96 | 70  | 70  | 100  | 8.23  | 12.8 | 9.54  | 0.0778 | 0.0594 |
| 0.96 - 0.93 | 55  | 55  | 100  | 8.71  | 7.9  | 8.94  | 0.1054 | 0.0614 |
| 0.93 - 0.9  | 51  | 51  | 100  | 8.12  | 4.4  | 5.47  | 0.1153 | 0.0837 |
| 0.9 - 0.87  | 50  | 50  | 100  | 8.6   | 5.4  | 6.73  | 0.1297 | 0.0743 |
| 0.87 - 0.85 | 58  | 58  | 100  | 8.64  | 4.9  | 6.23  | 0.1374 | 0.0772 |
| 0.85 - 0.83 | 72  | 72  | 100  | 7.82  | 4.2  | 6.27  | 0.1528 | 0.0922 |
| 0.83 - 0.8  | 74  | 74  | 100  | 6.69  | 3.2  | 5.27  | 0.1811 | 0.1173 |
| Inf - 0.8   | 987 | 988 | 99.9 | 9.05  | 18.5 | 10.96 | 0.0627 | 0.0519 |
